# Changes in group size during resource shifts reveal drivers of sociality across the tree of life

Albert B. Kao<sup>1\*</sup>, Amanda K. Hund<sup>2</sup>, Fernando P. Santos<sup>3</sup>, Jean-Gabriel Young<sup>4</sup>, Deepak Bhat<sup>5</sup>, Joshua Garland<sup>1</sup>, Rebekah A. Oomen<sup>6,7</sup>, and Helen F. McCreery<sup>8\*</sup>

<sup>1</sup>Santa Fe Institute, Santa Fe, NM 87501, USA

<sup>2</sup>Department of Ecology, Evolution and Behavior, University of Minnesota, St. Paul, MN 55108, USA

<sup>3</sup>Department of Ecology and Evolutionary Biology, Princeton University, Princeton, NJ 08544, USA

<sup>4</sup>Center for the Study of Complex Systems, University of Michigan, Ann Arbor, MI 48109, USA

<sup>5</sup>Okinawa Institute of Science and Technology Graduate University, Onna, Okinawa 904-0495, Japan

<sup>6</sup>Centre for Ecological & Evolutionary Synthesis, University of Oslo, 0315 Oslo, Norway

<sup>7</sup>Centre for Coastal Research, University of Agder, 4360 Kristiansand, Norway

<sup>8</sup>School of Engineering and Applied Sciences, Harvard University, Cambridge, MA 02138, USA

\*corresponding authors: ABK ([albert.kao@gmail.com](mailto:albert.kao@gmail.com)), HFM ([hmccreery@gmail.com](mailto:hmccreery@gmail.com))

## ABSTRACT

From biofilms to whale pods, organisms have repeatedly converged on sociality as a strategy to improve individual fitness. Yet, it remains challenging to identify the most important drivers—and by extension, the evolutionary mechanisms—of sociality for particular species. Here, we present a conceptual framework, literature review, and model demonstrating that the direction and magnitude of the response of group size to sudden resource shifts provides a strong indication of the underlying drivers of sociality. We catalog six functionally distinct mechanisms related to the acquisition of resources, and we model these mechanisms' effects on the survival of individuals foraging in groups. We find that whether, and to what degree, optimal group size increases, decreases, or remains constant when resource abundance declines depends strongly on the dominant mechanism. Existing empirical data support our model predictions, and we demonstrate how our framework can be used to predict the dominant social benefit for particular species. Together, our framework and results show that a single easily measurable characteristic, namely, group size under different resource abundances, can illuminate the potential drivers of sociality across the tree of life.

## Key words

social behavior, resource abundance, resource scarcity, evolution, optimal group size, cooperation

## Introduction

Living in a group can benefit an organism in numerous and diverse ways<sup>1–4</sup>. Sociality may improve an organism's caloric intake<sup>5–8</sup>, reduce the costs of maintaining homeostasis<sup>9–11</sup>, decrease predation risk<sup>12–15</sup>, facilitate the discovery or defense of higher quality habitats or breeding sites<sup>16–18</sup>, increase the probability of finding a mate or opportunities for extra-pair copulations<sup>4,19,20</sup>, or increase the survival probability of offspring<sup>18,21,22</sup>. However, there are also many potential costs of group living, including increased competition over resources, disease risk<sup>4</sup>, and probability of infanticide<sup>23,24</sup>.

A large body of literature explores how particular costs and benefits may affect group size and other social metrics<sup>25–30</sup>, yet it remains challenging to identify the most important drivers of sociality in particular species. For a given species, a subset of the potential benefits and costs will tend to dominate, and the balance of their magnitudes will determine the overall selection pressure for an organism to be social or asocial (as well as the typical group size)<sup>31–33</sup>. Knowledge of the underlying drivers of sociality is crucial not only for understanding the present distribution of social species and group sizes across taxa, but also for understanding the major evolutionary pathways by which sociality has arisen<sup>34</sup> (*i.e.*, whether sociality has generally been driven by a subset of potential benefits, with secondary benefits accruing subsequently), as well as the future of social species in the face of emerging natural and anthropogenic threats<sup>35–39</sup>.

32 In practice, measuring the selection pressures driving sociality is difficult. It may require performing one or more  
33 experiments for each potential benefit of sociality, and the magnitude of a benefit may vary nonlinearly with group size and  
34 across different environmental contexts<sup>22, 25, 27, 29, 40–42</sup>. As a result, it is likely infeasible to comprehensively measure all of the  
35 selection pressures governing sociality for any species. Instead, studies typically isolate and study only one of the proximate  
36 mechanisms at a time. Studying a mechanism in isolation may allow researchers to determine whether that mechanism offers a  
37 measurable benefit (or cost) to group living, but cannot provide insight into its magnitude relative to other potential benefits and  
38 costs. Therefore, this strategy is unlikely to reveal the dominant drivers of sociality.

39 Here, we demonstrate a new approach to the problem of determining the drivers of sociality, using literature reviews, a new  
40 conceptual framework, and stochastic and analytic models. In nature, when the abundance of resources (*e.g.*, food) shifts over  
41 relatively short time scales<sup>43</sup>, the mean group size has been empirically observed to shrink for some species<sup>44</sup>, increase for  
42 others<sup>45</sup>, and remain constant for yet other species. We hypothesize that these differences in the direction in which group sizes  
43 shift when resources become scarce may be due to differences in the dominant driver of sociality across those species<sup>46, 47</sup>. If  
44 true, then observing changes in group size when resource abundance shifts could be a relatively simple method to generate a  
45 shortlist of likely drivers of sociality for a given species. Further experiments could then target those specific candidate drivers,  
46 in order to identify the dominant driver of sociality for particular species, and across taxa. Because resource availability is  
47 relatively easy to alter in the lab and group size easy to measure, this may be an experimentally tractable strategy to rapidly  
48 identify the dominant drivers of sociality.

## 49 Results

### 50 The fundamental resource-related benefits and costs of sociality

51 We first surveyed the literature and compiled a list of potential benefits of sociality, focusing on those related to gaining and  
52 consuming resources. We took a broad definition of “sociality” to include any group-living organism in a wide range of taxa,  
53 including bacteria, protists, fungi, arthropods, fish, birds, and mammals. Despite myriad resource-related benefits described  
54 across taxa in the literature<sup>48</sup>, we found that they could be condensed into a small set of functionally distinct classes. In total,  
55 we identified six fundamental benefits of sociality related to gaining or using resources (Table 1). We also recorded a wide  
56 range of non-resource-related benefits and costs of sociality, but we collapsed them into a single class, despite their variety,  
57 because they are generally indistinguishable from one another when studying how group size changes under shifting resource  
58 abundance.

### 59 Fundamental resource-related benefits of sociality

60 Collective territoriality: Larger groups are able to secure access to more resources. This describes organisms that can  
occupy larger territories, or those that can travel further as a group in order to explore a larger area. For example, larger  
groups of capybaras have larger and higher-quality home ranges<sup>49</sup>, while larger *Volvox* colonies can move farther in the  
water column to exploit a larger productive area<sup>54</sup>.

61 Collective detection/capture: Larger groups detect and capture a resource with higher probability. This benefit may  
occur because larger groups have a higher probability of detecting a resource (*e.g.*, individuals in larger groups spend  
less time looking for predators due to “shared vigilance,” allowing them to devote more time to foraging) or of capturing  
a detected resource. For example, degus spend less time individually on vigilance and more time foraging when in  
groups<sup>57</sup>, goldfish in larger shoals spend less time foraging before discovering a prey item<sup>61</sup>, and *Myxococcus* bacteria  
more efficiently predate on cyanobacteria at higher densities<sup>70</sup>.

62 Collective niche expansion: Larger groups can successfully capture larger or higher-quality resources. This benefit  
expands the dietary niche of the social species by giving members of large groups access to novel resources, rather  
than simply increasing the probability of capturing a resource that is also accessible to smaller groups (collective  
sensing/capture). This includes social spiders that use collective web structures to capture larger prey<sup>7, 72, 73</sup>, and some  
pathogenic bacteria that suppress their virulence until a quorum is reached, in order to overcome a host’s immune  
responses<sup>77, 78</sup>.

| Resource-related benefit of sociality | Benefit description                                     | Example proximate forms                          | Examples across taxa                                                                                                                                                                                                                               |
|---------------------------------------|---------------------------------------------------------|--------------------------------------------------|----------------------------------------------------------------------------------------------------------------------------------------------------------------------------------------------------------------------------------------------------|
| Collective territoriality             | Increase number of resources available to group         | Accessing larger/higher quality territories      | capybara <sup>49</sup> , white-throated magpie-jays <sup>50</sup> , coyote packs <sup>51</sup> , acacia ants <sup>52</sup> , chimpanzees <sup>53</sup> , <i>Volvox</i> colonies <sup>54</sup> , ring-tailed lemurs <sup>6</sup>                    |
| Collective detection/capture          | Increase probability of capturing a resource            | Spending less time looking for predators         | mule deer <sup>55</sup> , greater rheas <sup>56</sup> , degus <sup>57</sup> , brown-headed cowbirds <sup>58</sup> , rabbitfishes <sup>59</sup> , tamarins <sup>60</sup>                                                                            |
|                                       |                                                         | Detecting resources with higher probability      | goldfish <sup>61</sup> , forest tent caterpillars <sup>62</sup> , mixed bird flocks <sup>63</sup> , Brewer's blackbirds <sup>64</sup> , guppies <sup>65</sup>                                                                                      |
|                                       |                                                         | Capturing resources with higher probability      | zebra lionfish <sup>8</sup> , aplomado falcons <sup>66</sup> , lions <sup>67</sup> , groupers and giant moray eels <sup>68</sup> , chimpanzees <sup>69</sup> , bacteria <sup>70</sup> , spinner dolphins <sup>71</sup>                             |
| Collective niche expansion            | Increasing size range of resources that can be captured | Hunting larger or higher quality prey            | social spiders <sup>7,72,73</sup> , African wild dogs <sup>74</sup> , ant predation <sup>75</sup> , Harris' hawks <sup>76</sup> , bacteria <sup>77,78</sup> , sevengill sharks <sup>79</sup> , orcas <sup>80,81</sup> , river otters <sup>82</sup> |
| Collective consumption                | Increase the amount of resource consumed per capita     | Defending kill from others                       | hyenas <sup>44,83</sup> , coyotes <sup>5</sup> , antibiotic production in bacteria <sup>84</sup> , primates <sup>47</sup> , resources monopolization in yeast <sup>85</sup> , ant cooperative transport <sup>86,87</sup>                           |
|                                       |                                                         | Slowing diffusion of nutrients                   | bacteria <sup>88</sup> , budding yeast <sup>89</sup>                                                                                                                                                                                               |
|                                       |                                                         | Capturing a larger fraction of prey group        | bubble-net feeding in humpback whales <sup>90</sup> , ospreys <sup>91</sup> , leaf-notching moths <sup>92</sup> , black-headed gulls <sup>93</sup> , blue tang surgeonfish <sup>94</sup> , bacteria <sup>95</sup> , orcas <sup>96</sup>            |
| Collective energetics                 | Decrease rate of energy expenditure                     | Moving more efficiently                          | grey mullet <sup>97</sup> , ducklings paddling on water <sup>98</sup> , great white pelicans in flight <sup>99</sup> , aquatic crustaceans <sup>100</sup>                                                                                          |
|                                       |                                                         | Spending less energy on homeostasis              | emperor penguins <sup>101</sup> , honeybees <sup>102</sup> , big brown bats <sup>103</sup> , cavies <sup>104</sup>                                                                                                                                 |
| Collective dispersal                  | Increase probability of successful dispersal            | Moving away from current environment faster      | Mormon crickets <sup>105-107</sup> , colonial salps <sup>108</sup> , fruiting-body-assisted dispersal in <i>Dictyostelium</i> <sup>109</sup> and <i>Myxobacteria</i> <sup>110</sup> , spider mites <sup>111</sup>                                  |
|                                       |                                                         | Accessing collective benefits while dispersing   | storks locating thermals <sup>112</sup> , V-formations in northern bald ibises <sup>113</sup>                                                                                                                                                      |
|                                       |                                                         | Accessing collective benefits in new environment | ants ( <i>Pogonomyrmex</i> <sup>114</sup> , <i>Atta</i> <sup>115</sup> , <i>Lasius</i> <sup>116</sup> ), termites <sup>117</sup> , spider mites <sup>118</sup> founding new colonies                                                               |

**Table 1. Six fundamental resource-related benefits of sociality.** For each benefit of sociality, we give a brief description, note specific ways in which the benefit may manifest in different taxa, and list several examples of the benefit across diverse taxa. In addition to these six resource-related benefits, in our model we include the net effect of all non-resource-related benefits of sociality as a single benefit.

*Collective consumption:* Individuals in larger groups can consume more, per capita, of a captured resource before it is lost. Resources may be lost by being stolen by conspecifics or heterospecifics, or by environmental forces. Larger groups, therefore, may be able to better defend resources from others, as with coyotes<sup>5</sup>, or ants that utilize cooperative transport, carrying large resources to the nest, thus removing them from competition<sup>86,87</sup>. Alternatively, collective feeding of a resource comprised of many components can permit the consumption of a larger fraction of that resource, such as biofilms that encapsulate a resource and slow the diffusion of nutrients<sup>88,89</sup>, or humpback whales that use bubble nets to feed on a school of fish<sup>90</sup>.

64 Collective energetics: Individuals in larger groups expend less energy, on average, per unit time. This benefit may be due to aerodynamic or hydrodynamic benefits, such as with great white pelicans, which have reduced energy expenditure while flying in a V-formation<sup>99</sup>. Other social animals are better able to thermoregulate in a large group, such as emperor penguins<sup>101</sup> and honeybees<sup>102</sup>, lowering the energetic costs of maintaining homeostasis.

65 Collective dispersal: Larger groups can more easily disperse from a poor habitat to a new habitat. This benefit may arise because groups move more efficiently while searching for a new environment, such as Mormon crickets that move more ballistically as a swarm<sup>105–107</sup> and slime molds that self-assemble into a dispersal stalk<sup>109</sup>. Alternatively, larger groups may disperse more successfully by accessing one or more of the other collective benefits when traveling (such as storks saving energy by collectively sensing air thermals<sup>112</sup>) or when they arrive at their new habitat (such as some ant species that exhibit increased survival of new colonies when multiple queens found nests together<sup>114–116</sup>).

### 66 **Fundamental resource-related cost of sociality**

67 Intragroup competition: Individuals in larger groups suffer increased competition for resources. While the details of intragroup competition differ among species (*e.g.*, the size of the finder's share, whether dominant individuals claim a larger share, whether group mates are subject to scramble or contest competition), in general there will be fewer resources available per capita as group size increases.

### 68 **Non-resource-related benefits and costs of sociality**

69 In addition to these fundamental resource-related benefits and costs of sociality, there are a large number of other effects of sociality that are unrelated to resource acquisition. Such benefits include avoiding predation by detecting predators more reliably (the “many eyes” hypothesis), evading predators more effectively (“Trafalgar” or “confusion” effects), shunting risk onto groupmates (the “selfish herd” principle), and diluting the overall risk of predation<sup>4</sup>. Sociality may also affect the probability of acquiring mates (such as in leks<sup>119</sup>, and harems<sup>120</sup>), increase fitness via cooperative breeding<sup>121,122</sup>, decrease fitness via inbreeding<sup>123</sup>, and alter parasite risk<sup>124–128</sup>. In short, there are a large number of potential benefits and costs of sociality that are not directly related to resource acquisition, which we combine into a single class (*other mortality*).

70 All of the sociality mechanisms described here, resource-related or not, may in principle result in net benefits or costs for some species and contexts. For example, the probability of capturing prey may shrink as group size increases if the prey can more easily detect a larger group. For simplicity, we assume that competition represents a cost of sociality and, for all other mechanisms, we focus on the net benefits of sociality.

### 74 **Modeling how benefits of sociality and resource abundance affect group sizes**

75 With this understanding of the fundamental benefits of sociality, we can investigate how these benefits may impact group size when resource abundance shifts. To do so, we introduce a general model of a group foraging for resources, which we briefly describe qualitatively here, depict schematically in Figure 1, and describe quantitatively in *Methods: Detailed description of the model framework*.

76 In the model, a group exists in an environment containing resources whose sizes follow a power-law distribution, based on empirical and theoretical work on mass-abundance relationships in nature<sup>129–131</sup> (Figure 1, *the environment*). Consequently, during a simulation a group typically has access to many small resources and few large resources. A group is assigned a territory of a certain size, giving it access to a particular number of potential resources (Figure 1, *territoriality*).

77 At the start of the simulation, each individual in the group has a store of energy. During the simulation, the group attempts to detect, capture, and consume each of the potential resources. There is some probability that the group successfully detects and captures a particular resource (Figure 1, *detection/capture*); however, the group is limited to those resources that are within its niche (Figure 1, *resource niche*). If a resource has been successfully captured, each individual in the group extracts some energy from it, based on how much can be consumed before it is lost (Figure 1, *consumption*), and assuming that individuals in the group share resources equally (Figure 1, *intragroup competition*). As the group tries to capture and consume the available resources, each individual burns a certain amount of energy (Figure 1, *energetics*), and there is some probability that an individual dies due to a non-resource-related cause (Figure 1, *other mortality*). If the individuals in the group run out of energy during the simulation, then the group attempts to disperse to a new habitat; it successfully disperses with some probability and otherwise the individuals in the group die (Figure 1, *dispersal*). Therefore, an individual survives a simulation if 1) it does not die from a non-resource-related cause and does not run out of energy, or 2) it does not die from a non-resource-related cause and runs out of energy but successfully disperses.

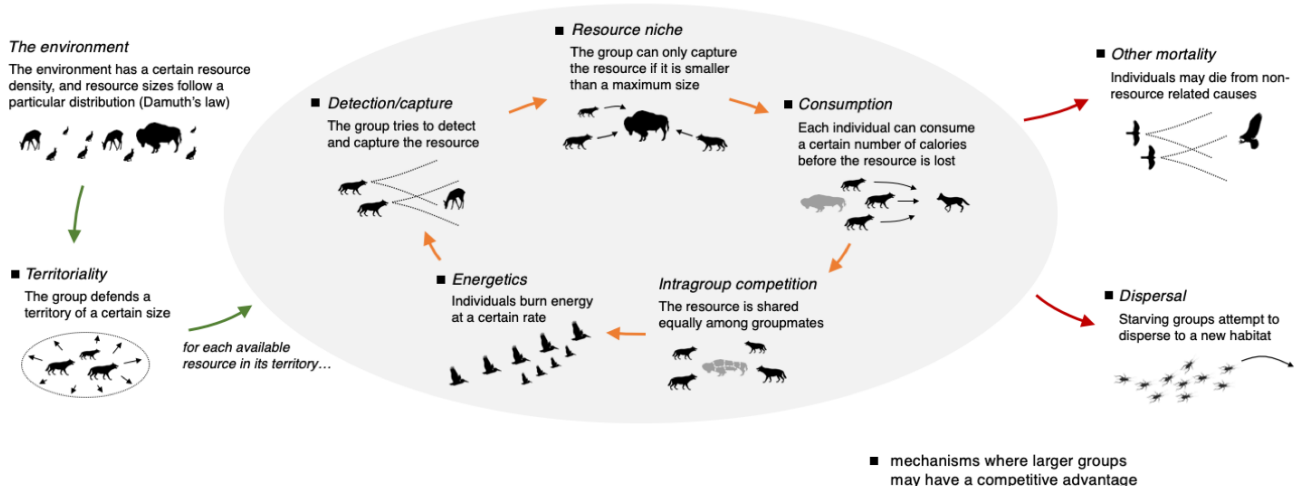

**Figure 1. Modeling framework for investigating the effects of the benefits of sociality and resource abundance on group sizes.** We specify an environment, which consists of a particular resource density and a power-law resource mass-abundance relationship. A group is allocated a territory of a certain size, which provides it access to a certain number of potential resources. The group then tries to detect, capture, and consume each resource in its territory, spending energy in the process. If the individuals in the group run out of energy, then the group attempts to disperse to a new habitat. During a simulation, individuals may also die from non-resource-related causes. The probability of surviving a simulation, as a function of group size, the dominant benefit of sociality, and resource abundance, is recorded. Although mammals or birds are typically used here as an illustration of different parts of the model framework, we stress that this framework can be used to model a wide variety of taxa.

95 For each simulation, we “turned on” one of the potential benefits of sociality, such that larger groups exhibit improved  
 96 performance in that aspect of the simulation (Figure 1, black squares). We ran simulations at different group sizes, and  
 97 across a wide range of all of the free parameters of the model, turning on each of the benefits individually (for simplicity and  
 98 interpretability, we did not consider multiple potential benefits acting in concert, though our model could be used to perform  
 99 such analyses in the future). For each combination of parameter values, we ran 10,000 simulations for each group size ranging  
 100 from 1 to 100 and computed the optimal group size that maximized survival probability, for both an “abundant resources”  
 101 condition and a “scarce resources” condition (*Methods: Computing the optimal group size*).

### 102 The effect of the sociality benefit class on group size shifts

103 Depending on which benefit of sociality was present in the simulation, we found that the optimal group size can decrease,  
 104 increase, or stay the same when resources become scarce. In Figure 2A, we show illustrative examples of the optimal group  
 105 size decreasing (when the collective detection/capture benefit of sociality was present) and increasing (when the collective  
 106 consumption benefit of sociality was present). In addition to our stochastic simulations, we also developed an analytical  
 107 solution to our model (exact when the number of resources  $\mu = 1$ , see *Methods: Analytical solution*), which closely matches  
 108 our simulation results (Figure 2A).

109 Across all of parameter space, a given benefit of sociality led to social groups (*i.e.*, survival probability was maximized  
 110 when  $M > 1$ , for either the abundant or scarce resource condition), in 11 to 82% of sets of parameter values, depending on the  
 111 active social benefit (Figure 2B). In subsequent analyses, we focused on those sets of parameter values that permitted social  
 112 groups, since our aim was to study social, rather than asocial, species.

113 Within this restricted region of parameter space, between 13 to 76% of sets of parameter values led to a shift in group size  
 114 when resource abundance shifted (Figure 2C), with the territoriality, detection/capture, consumption, and energetics benefits  
 115 most frequently leading to shifts in group size. Furthermore, the magnitude and direction of group size shifts strongly depended  
 116 on which benefit of sociality was present (Figure 2D). The territoriality and detection/capture mechanisms tended to lead to  
 117 decreases in group size when resources became scarce, with a wide range of magnitudes, depending on the parameter values. By  
 118 contrast, the energetics mechanism also generally resulted in decreases in group size under scarcity, but the magnitudes tended

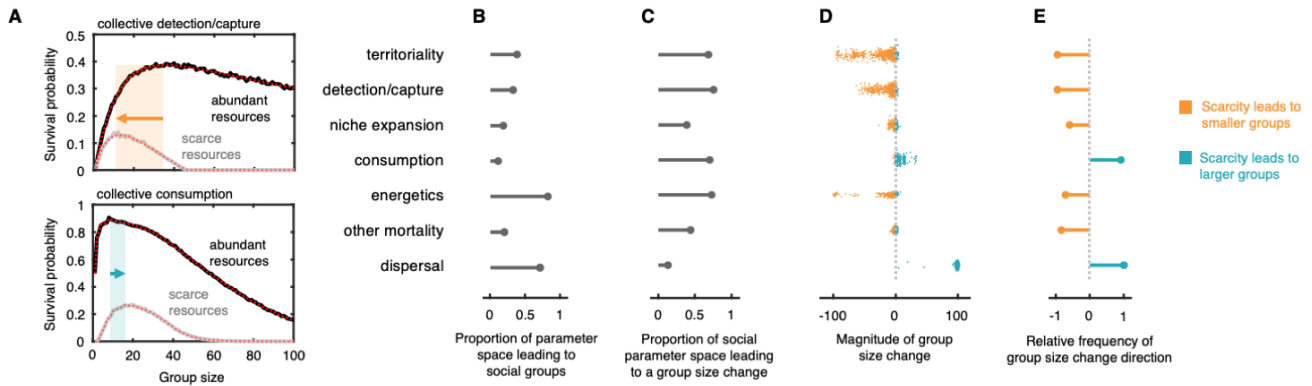

**Figure 2. The benefits of sociality can cause either increases or decreases in group size when resources become scarce.**

**A.** Resource scarcity can lead to decreases (top) or increases (bottom) in the optimal group size, depending on the dominant benefit of sociality and the parameters of the environment. In the top panel, collective detection/capture is the dominant benefit, with parameters  $\mu = 1$ ,  $k_s = 0.1k_{s,max}$ ,  $s = 1.01$ ,  $\alpha_s = 0.01$ ,  $\alpha_h = 0.5$ , and  $\alpha_d = 0.999$ , while in the bottom panel, collective consumption is the dominant benefit, with parameters  $\mu = 20$ ,  $\gamma_d = 0.5\gamma_{max}$ ,  $s = 1.01$ ,  $\alpha_s = 0.5$ ,  $\alpha_h = 0.25$ , and  $\alpha_d = 0.001$  (see *Methods: Detailed description of the model framework* for parameter definitions). Black and grey lines show results from simulations (mean of 10,000 repetitions) for the abundant and scarce resource conditions, respectively, while the red and pink lines show the analytical solution for the same parameter values as in the simulations. **B.** The proportion of parameter space where the optimal group size was greater than 1 for either the abundant or the scarce resource condition, for each benefit of sociality. **C.** The proportion of social parameter space (i.e., the fraction of parameter space shown in B) that leads to a change in group size. **D.** Scatter plot of the resulting group size shift for those sets of parameter values that led to a group size shift (orange points indicate that group size decreases when resources are scarce, blue points indicate that group size increases when resources are scarce; a small amount of jitter was added in both the horizontal and vertical directions to more clearly visualize the data points). **E.** The relative frequencies of the shift direction for those sets of parameter values that led to a group size shift (a value of -1 indicates that all group size shifts were decreases in group size when resources are scarce, +1 indicates that all group size shifts were increases in group size when resources are scarce).

119 to be either small or large. While the niche expansion and other mortality mechanisms could lead to either decreases or increases  
 120 in group size, the magnitudes of these shifts tended to be small (and therefore possibly difficult to detect in experiments). The  
 121 consumption and dispersal mechanisms tended to lead to group size increases under scarcity, with collective dispersal leading  
 122 to very large increases in group size (however, for this mechanism a wide range of group sizes had nearly identical survival  
 123 rates, so group size changes in nature or in experiments may be smaller than shown in Figure 2D; see *Methods: Computing the*  
 124 *optimal group size*). We further quantify group size shifts under scarcity by plotting the relative frequency of decreases and  
 125 increases in group size (Figure 2E), confirming that the consumption and dispersal benefits are the only two that robustly cause  
 126 increases in group size under scarcity, while all of the other benefits tend to lead to decreases in group size (though with widely  
 127 varying magnitudes).

## 128 Empirical evidence for the model predictions

129 We returned to the literature to examine the extent to which existing data support, or contradict, our theoretical predictions.  
 130 Based on the quantitative results in Figure 2, we partitioned the seven benefits of sociality into three groups: those that tend to  
 131 lead to decreases (territoriality, detection/capture, and energetics), increases (consumption and dispersal), or only very small  
 132 changes in group sizes (niche expansion and other mortality) when resources become scarce (Figure 3, “Model results”). The  
 133 fact that the seven benefits of sociality evenly partition into these three groups suggests that a single measurement (direction  
 134 of group size shift under scarcity) can be a highly informative indicator of the dominant driver of sociality for a species by  
 135 efficiently selecting a subset of the possible benefits. We then looked for empirical evidence of group size shifts when resource  
 136 abundance shifts.

137 While existing data are relatively scant, we found a high degree of agreement between empirical examples and our model  
 138 predictions (Figure 3, “Empirical data”). For example, there is evidence that lion prides<sup>132</sup>, chimpanzee troops<sup>133</sup>, bottlenose

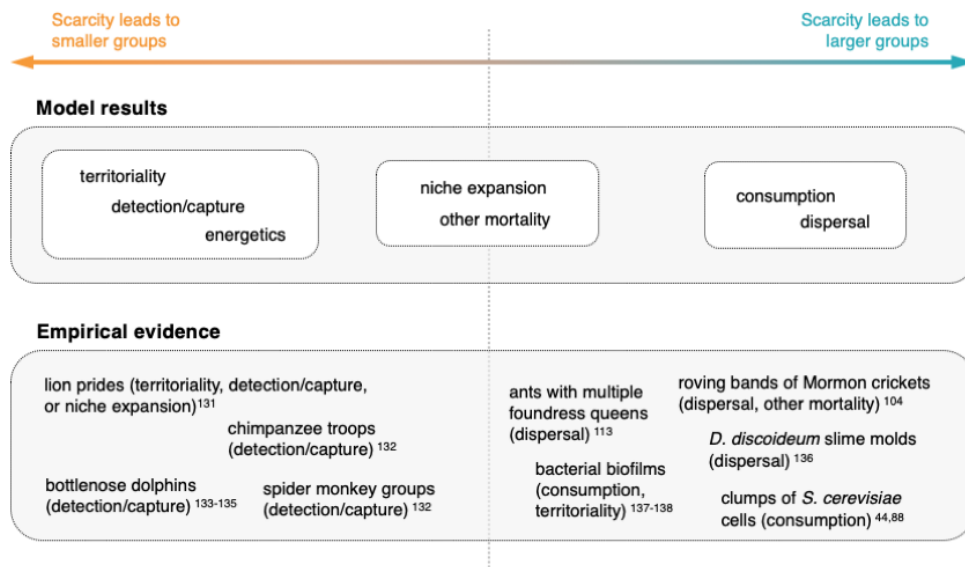

**Figure 3. Comparing our model predictions to existing empirical data.** The model results, shown in Figure 2B-E, lead to broad classifications of the benefits of sociality based on their general tendency to produce either decreases, increases, or only minor shifts in group size when resources become scarce. Existing empirical evidence, while relatively scant, tend to agree with our model predictions. We note that this comparison is preliminary, since even for the species that we list in this figure, the dominant benefit of sociality is not known with certainty.

139 dolphin pods<sup>134–136</sup>, and spider monkey troops<sup>133</sup> are smaller when resources are scarce. The most plausible benefit of sociality  
 140 for these species, as previously established from empirical data, is that group living improves the ability of individuals to  
 141 capture prey or other resources, whether due to improved detection or capture of resources, increased territory size, or ability to  
 142 capture larger resources.

143 By contrast, several species are known to increase their group size under scarcity. Large bands of Mormon crickets likely  
 144 have an improved ability to discover new habitats (dispersal), but may also benefit from improved predator avoidance (other  
 145 mortality)<sup>105</sup>. Slime molds, such as *Dictyostelium discoideum*, switch from a solitary to a social phase when food is scarce,  
 146 dispersing via spores within an aggregate fruiting body (dispersal)<sup>137</sup>. For some species of ants, new colonies comprising  
 147 multiple foundress queens are more likely to survive than single queens (dispersal)<sup>114</sup>. Bacteria can form biofilms<sup>138, 139</sup> and the  
 148 yeast *Saccharomyces cerevisiae* can form clumps<sup>45, 89</sup> when nutrients are scarce, which absorb more of a resource's nutrients  
 149 and/or cooperatively produce digestive enzymes (consumption). Some of the species likely benefiting from collective dispersal  
 150 exhibit the extremely large increases in group size that we observed in our model, such as Mormon crickets and locusts that  
 151 transition from solitary individuals to vast swarms.

152 For other species, group size shifts when resource abundance shifts but with less clear evidence of the driver of sociality.  
 153 For example, finches and monk parakeets form larger flocks when resources are scarce<sup>140, 141</sup>. These groups may benefit  
 154 from improved information gathering and sharing (collective sensing/capture), but alternatively large groups may form simply  
 155 due to aggregation at a smaller number of available food patches. Similarly, many gram-negative bacteria form biofilms  
 156 only in nutrient-rich media and detach when nutrients become scarce, although the function of the biofilm is not known with  
 157 certainty<sup>142</sup>. Hyenas were shown to decrease their group size under scarcity, with hypothesized mechanisms driving sociality  
 158 including collective capture, collective consumption, and improved infant safety<sup>44</sup>.

159 While existing empirical data generally support our model predictions, we stress that this comparison is preliminary, as the  
 160 dominant driver of sociality is not known with certainty for any species. For many species, there are multiple social mechanisms  
 161 hypothesized to significantly affect individual fitness. In Figure 3, we listed species for which the set of possible mechanisms is  
 162 reasonably small, or for which there is greater confidence among researchers about which is the dominant driver of sociality.  
 163 We did not list in Figure 3 species with evidence of group size shifts under scarcity but with less known about the underlying  
 164 drivers.

165 Experiments specifically designed to test our model predictions are necessary. A simple such test would be to change  
166 resource availability while keeping other aspects of the environment constant (such as patchiness), recording any changes in  
167 group size. Our model can produce a reduced subset of potential drivers of sociality based on the group size shift, and these  
168 potential drivers can be individually tested to measure the associated selection pressure. Our model predicts that at least one of  
169 these potential drivers will exhibit a substantially stronger effect compared to the other possible drivers of sociality.

### 170 **Generating predictions for particular species**

171 In the analyses above, we aggregated the results of all of our simulations, which were conducted across a wide range of  
172 parameter values (see *Methods: Detailed description of the model framework*). We deliberately selected a wide range in order  
173 to capture the lifestyles of diverse organisms and environments across the tree of life. However, researchers wanting to identify  
174 the dominant driver of sociality for a particular species will likely have some knowledge of the specific region of parameter  
175 space that it inhabits. If so, then our model could be run within that specific region of parameter space and more targeted  
176 predictions could be generated for that species.

177 Here, we demonstrate how our model framework could be used to create a shortlist of likely drivers of sociality for particular  
178 species. To avoid making unsubstantiated assumptions about any real biological species, we showcase how to apply our  
179 framework to two mythological creatures: dragons and unicorns (Figure 4A,D). We assume that dragons are carnivorous,  
180 large, fierce, can fly, and can breathe fire. By contrast, unicorns are herbivorous, smaller, timid, live in forests, and we assume  
181 that their horns result mainly from sexual selection and are not effective defensive tools. Based on these traits, we identified  
182 hypothetical parameter ranges for both species, as a researcher would do for their focal real species—see *Methods: Dragon and*  
183 *unicorn analyses* for a complete explanation of our chosen parameters for these examples.

184 We can narrow down the list of likely drivers of sociality for dragons and unicorns even without collecting any additional  
185 data, simply by knowing that these two species are social and reside in particular regions of parameter space. Within the dragon  
186 region of parameter space, our model predicts that collective consumption and other mortality benefits can never lead to social  
187 groups (optimal group size  $> 1$ ) regardless of resource abundance (Figure 4B). Since we presume that dragons can be found in  
188 groups (because we are asking why dragons are social), we can eliminate these benefits as likely sociality drivers. For unicorns,  
189 on the other hand, we can eliminate only collective consumption with this logic (Figure 4E).

190 To narrow the list of potential drivers even further, we took a likelihood approach. Supposing a researcher observes  
191 how group size changes when resources become scarce, we can assign a probability that each of the potential benefits of  
192 sociality resulted in the observed outcome. In other words, if we observe a decrease (or increase or no change) in dragon  
193 group size when resources become scarce, what proportion of simulations resulting in decreases were caused by each potential  
194 benefit? Considering only the easily-measurable direction, rather than the magnitude, of group size shifts, we highlight those  
195 mechanisms that had a probability greater than 0.1 of generating the given group size shift. In the case of a decrease in group  
196 size for dragons, for example, our model predicts that collective territoriality and collective detection/capture are the most likely  
197 drivers of sociality (orange dots and squares in Figure 4C). If no change in group size is measured, collective energetics and  
198 collective dispersal are the most likely drivers (grey dots and squares). The model predicts that increases in group size should  
199 not be observed in the region of parameter space that dragons reside, regardless of the driver of sociality (blue dots in Figure  
200 4C). If unicorn groups decrease in group size under scarcity, our model highlights four potential drivers of sociality: collective  
201 territoriality, collective detection/capture, collective niche expansion, and other mortality (orange dots and squares in Figure  
202 4F). However, consistent with Figure 2, for collective niche expansion and other mortality we expect only small decreases in  
203 group size, which may be more difficult to measure in practice. An increase in group size would suggest the collective dispersal  
204 mechanism as the dominant driver of sociality (blue dots and squares), while no change in group size highlights the collective  
205 niche expansion, collective energetics, and collective dispersal mechanisms (grey dots and squares in Figure 4F).

206 Overall, these results demonstrate how predictions can differ depending on the region of parameter space in which a species  
207 resides. Simply by knowing that the species under study is social, or additionally, knowing how group sizes shift when resources  
208 become scarce, one can dramatically reduce the list of likely drivers of sociality. Researchers could then test the remaining  
209 sociality drivers to identify the main drivers of sociality for that species.

## 210 **Discussion**

211 We described here a novel conceptual framework—applicable across diverse taxa, from bacteria to large mammals—to study  
212 how a variety of potential benefits of sociality can affect group size (Figure 1). While there are a large number of potential



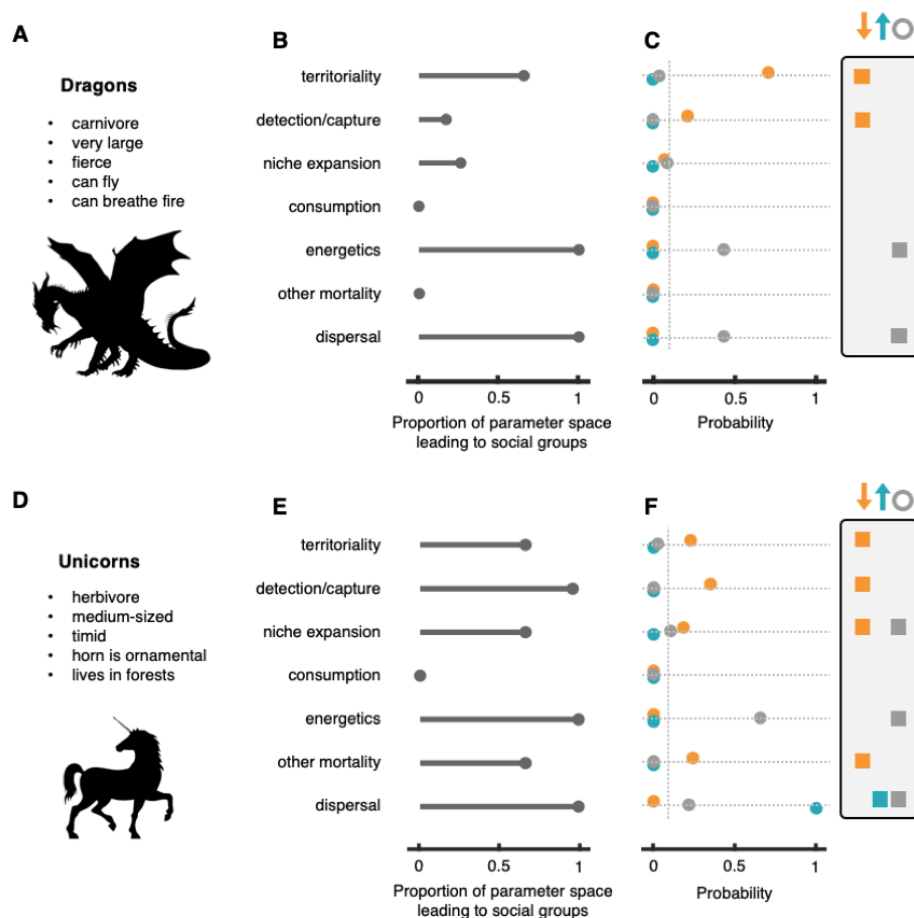

**Figure 4. Model predictions may be taxon-dependent.** We apply our model to two mythological creatures, dragons and unicorns. **A.** Dragons are large, can fly, and can breathe fire. **B.** The proportion of dragon parameter space where the optimal group size was greater than 1 for either the abundant or the scarce resource condition, for each benefit of sociality. **C.** The probability that observed group size changes arise from each benefit type. The x-axis shows the proportion of scarcity-caused group size decreases (in orange), increases (in blue), and simulations with no change (in grey) attributable to each benefit type, for the dragon parameter space. Inset at right highlight benefits that surpass 0.1 probability of driving a given result. Parameters are described in *Methods: Detailed description of the model framework*, and the dragon parameter space for these analyses was estimated as described in *Methods: Dragon and unicorn analysis*. **D.** Unicorns are medium-sized, timid, and have only ornamental horns. **E.** The proportion of unicorn parameter space where the optimal group size was greater than 1 for either the abundant or the scarce resource condition. **F.** The probability that observed group size changes arise from each benefit type for the unicorn parameter space.

213 benefits related to gaining resources, our analysis condensed these benefits into six classes with fundamentally different  
 214 functional forms (Table 1). Stochastic simulations of our model of groups acquiring resources, and its analytic solution, revealed  
 215 that the direction and magnitude of group size changes due to declines in resource abundance are strongly dependent on which  
 216 benefit is the underlying driver of sociality (Figure 2). This allowed us to partition the benefits of sociality into three groups:  
 217 those that tend to lead to smaller groups under scarcity (collective territoriality, collective detection/capture, and collective  
 218 energetics), those that tend to lead to little or no change in group size (collective niche expansion, other mortality), and those  
 219 that tend to lead to larger groups under scarcity (collective consumption, collective dispersal) (Figure 3). Although currently  
 220 limited, existing data on a variety of species appear to broadly support our model predictions. Finally, we demonstrated how a  
 221 researcher could apply our framework to particular species and how the model can make different predictions depending on the  
 222 relevant parameter space for that species (Figure 4).

223 Our approach of taking a bird's eye view of all resource-related benefits of sociality across taxa necessitated making

224 simplifying assumptions. We implicitly assume that resources are randomly distributed in the environment and can only  
225 shift in abundance, that available resources follow a particular mass-abundance relationship, and that the abundance of all  
226 resources declines uniformly under scarce conditions. In real habitats, resources can also vary in patchiness, may follow  
227 different mass-abundance relationships, and the abundance of resources may decline nonuniformly (*e.g.*, large resources may  
228 be more or less resilient during droughts). Furthermore, resources may shift not only in abundance but also in frequency and  
229 predictability. We also do not model intragroup dynamics (*e.g.*, dominance hierarchies, finder's shares, division of labor, etc.),  
230 intergroup competition, interspecies interactions, demographic structures, and other strategies besides dispersal to stave off  
231 starvation. In our model, we assumed that all of the mechanisms, except intragroup competition, function as potential benefits  
232 of sociality, rather than potential costs. Despite—and because of—these simplifications, our model highlights fundamental  
233 dynamics governing group size across species. Nonetheless, our model framework is general enough to accommodate these  
234 additional features if they are particularly important to a species of interest.

235 An important direction for future research is to apply our modeling framework to understand how multiple benefits of  
236 sociality may interact with each other. Many social species are likely to benefit from multiple mechanisms, such as collective  
237 territoriality, collective detection/capture, and collective niche expansion. These may combine nonlinearly to promote sociality  
238 and affect group size shifts and may alter our predictions of what group sizes we expect to observe in nature.

239 Importantly, our framework reveals that group size shifts under changes in resource availability can be an insightful clue  
240 about the underlying driver of sociality. Rather than performing separate experiments on each possible benefit of sociality  
241 (*i.e.*, the many proximate forms, some of which are listed in Table 1), we argue that simply observing group size changes can  
242 substantially reduce the set of likely drivers of sociality. This experiment is often tractable and cost-effective to perform in the  
243 lab. In this work, we reported changes in optimal group size, but some groups may have a relatively fixed group size, and may  
244 not adjust over the course of a typical experiment. In such cases, researchers could use proxies for optimal group size, such as  
245 levels of stress hormones in groups of different sizes<sup>6</sup>. Comparative phylogenetic approaches, such as correlating group size to  
246 typical habitat conditions, could also be fruitful for taxa with relatively fixed group sizes, for which we expect changes to occur  
247 on evolutionary timescales.

248 Knowing the major drivers of sociality across species is crucial to a comparative understanding of how sociality evolves  
249 across diverse biological systems<sup>143</sup>, as well as anticipating the resilience of social species when facing environmental change.  
250 For example, we observe a possible correlation between organism size and group size change, or likely sociality driver (Figure  
251 3); future research on this correlation could explore its implications for the evolution of sociality and social resilience. Our  
252 model framework demonstrated that the different benefits of sociality differ in their propensity to generate social groups (Figure  
253 2B). Improving our understanding of which benefits underlie sociality among extant species will allow us to test whether some  
254 benefits tend to drive the evolution of sociality, with other benefits accruing secondarily. In addition, this framework could be  
255 applied at the sub-organismal level, potentially explaining the group sizes of cellular aggregations such as sperm cells<sup>144, 145</sup>,  
256 erythrocytes and platelets<sup>146–148</sup>, and some immune cells<sup>149–151</sup>. Taking a high-level view of sociality across the tree of life,  
257 while abstracting away many of the finer details, may therefore be a powerful approach towards a deeper understanding of one  
258 of the major evolutionary transitions.

## 259 **Acknowledgements**

260 ABK acknowledges support from a Baird Scholarship, and ABK and JG acknowledge support from an Omidyar Fellowship  
261 from the Santa Fe Institute. AKH, J-GY, FPS, RAO, and HFM acknowledge support from a James S. McDonnell Postdoctoral  
262 Fellowship Award. DB gratefully acknowledges financial support from NSF Grant No. DMR-1608211. The James S.  
263 McDonnell Foundation and the Santa Fe Institute additionally funded meetings and a working group grant for this work.  
264 Andrew Berdahl contributed ideas (particularly on the ballistic motion of locust swarms) that stimulated initial discussions for  
265 this project.

## 266 **Data availability**

267 We will publish the data and code associated with our model upon publication.

## 268 Author contributions

269 ABK conceived of the study. AKH, HFM, ABK, FPS, and RAO performed the literature review to identify the fundamental  
270 drivers of sociality. AKH, HFM, and RAO performed the literature review to compare the model predictions to existing  
271 empirical evidence. All authors contributed to the conceptual development of the model. ABK, FPS, JG, J-GY, and DB and  
272 wrote simulation code, and ABK ran the simulations and generated the figures. J-GY, DB, and FPS developed the analytical  
273 solution to the model. ABK, HFM, AKH, FPS, J-GY, and RAO drafted the manuscript. All authors edited the manuscript and  
274 gave final approval for publication.

## 275 Methods

### 276 Detailed description of the model framework

277 First, we specify the resource environment within which the group forages. The environment contains a certain density of  
278 resources; these resources vary in size from 0 to  $C_{max} = 1$ , and the probability density  $P(C)$  that a resource is a certain size  $C$   
279 is given by  $(1 + \gamma_C)C^{\gamma_C} / C_{max}^{1+\gamma_C}$ , where we set the exponent to  $\gamma_C = -3/4$ , following existing empirical and theoretical work on  
280 mass-abundance relationships in nature, known as Damuth's law<sup>129–131</sup>. A group is assigned a territory, the area of which is  
281 proportional to the number of potential resources,  $\mu$ , that the group can access during the simulation.

282 Each individual in a group of size  $M$  begins with  $c_0$  energy. During the simulation, the group attempts to detect, capture,  
283 and consume each of the  $\mu$  potential resources. There is some probability  $p_s$  that the group successfully detects and captures  
284 that resource. However, the group can capture a resource only if it is within its niche, *i.e.*,  $C \leq C_h$ , where  $C_h$  is the maximum  
285 size resource that the group can capture; the group must ignore the resource if it is too large. If the resource has been  
286 successfully captured, then each individual in the group consumes some portion of the resource. Each individual can potentially  
287 consume  $c_d$  of the resource before it is lost (*e.g.*, to conspecifics, heterospecifics, or the environment). However, because we  
288 assume that groupmates share resources equitably, individuals can each consume a maximum of  $C/M$  of the resource (*i.e.*,  
289 if the entire resource is consumed). Therefore, the actual amount of the captured resource that an individual consumes is  
290  $c_c = \min\{c_d, C/M\}$ ; if the resource was not detected and captured, or was outside of its niche, then  $c_c = 0$  for that resource.

291 While the group tries to capture the available resources, each individual burns a total of  $c_b$  energy. In addition, there is some  
292 probability  $p_p$  that an individual dies due to some non-resource-related cause. If the individuals in the group run out of energy  
293 during the simulation, *i.e.*,  $c_0 + \sum c_c - c_b < 0$ , then the group attempts to disperse to a new habitat; it successfully disperses with  
294 some probability  $p_e$  and otherwise the individuals in the group die.

295 Therefore, an individual survives a simulation if 1) it does not die from a non-resource-related cause and does not run out of  
296 energy, or 2) it does not die from a non-resource-related cause and runs out of energy but successfully disperses.

297 For a given simulation, we “turned on” one of the potential benefits of sociality; depending on which mechanism is turned  
298 on, the magnitude of one of  $\mu$ ,  $p_s$ ,  $C_h$ ,  $c_d$ ,  $c_b$ ,  $p_p$ , or  $p_e$  will be a function of group size  $M$ . We used generic functions to model  
299 how these variables change with  $M$ :

300 Collective territoriality:  $\mu = \mu_1 M^{\gamma_t}$ , where  $\mu_1$  is the number of potential resources available to a solitary individual, and  $\gamma_t$   
301 is the strength of this social benefit.

302 Collective detection/capture:  $p_s = 1 - (1 - \alpha_s)^{k_s(M-1)+1}$ , where  $\alpha_s$  is the probability that a solitary individual detects and  
303 captures a resource within its niche, and  $k_s$  is the strength of this social benefit. This functional form, as well as similar ones  
304 below, are based on the “perfect many eyes” scenario<sup>152</sup>, but modified to allow for different strengths of the social benefit; this  
305 function increases from  $p_s(M = 1) = \alpha_s$  to  $p_s(M = \infty) = 1$ .

306 Collective niche expansion:  $C_h = \alpha_h C_{max} M^{\gamma_h}$ , where  $\alpha_h$  is the maximum size resource that a solitary individual can capture,  
307 as a proportion of  $C_{max}$ , and  $\gamma_h$  is the strength of this social benefit.

308 Collective consumption:  $c_d = \alpha_d C_{max} M^{\gamma_d}$ , where  $\alpha_d$  is the amount of a captured resource, as a proportion of  $C_{max}$ , that a  
309 solitary individual can consume before the resource is lost, and  $\gamma_d$  is the strength of this social benefit.

310 Collective energetics:  $c_b = c_1((1 - \alpha_b)^{k_b(M-1)+1} + \alpha_b)$  where  $c_1$  is the amount of energy that a solitary individual burns  
311 during the simulation,  $k_b$  is the strength of this social benefit, and  $\alpha_b$  represents the fraction of energy burned by a solitary  
312 individual that an individual in an infinitely large group burns. This function decreases from  $c_b(M = 1) = c_1$  to  $c_b(M = \infty) =$   
313  $\alpha_b c_1$  (where  $0 \leq \alpha_b \leq 1$ ).

314 Other mortality:  $p_p = \alpha_p^{k_p(M-1)+1}$ , where  $\alpha_p$  is the probability that a solitary individual dies from a non-resource-related  
315 cause, and  $k_p$  is the strength of this social benefit. This function decreases from  $p_p(M = 1) = \alpha_p$  to  $p_p(M = \infty) = 0$ .

316 *Collective dispersal*:  $p_e = \alpha_e(1 - \alpha_e^{k_e(M-1)})$ , where  $\alpha_e$  is the probability that an infinitely large group successfully disperses,  
 317 and  $k_e$  is the strength of this social benefit. This function increases from  $p_e(M = 1) = 0$  to  $p_e(M = \infty) = \alpha_e$ .

318 We set maximum values of the strengths of the social benefits, typically such that the benefit can only grow sublinearly with  
 319 group size, with some exceptions (see *Methods: Limits on the strength of the social benefits*), and ran simulations for each  
 320 mechanism, where the strength of the mechanism was set to 10%, 50%, or 90% of its maximum value. We set  $\mu_1$  to either 1 or  
 321 20 to capture different ecological regimes (where, respectively, resources are relatively rare or common), and  $\alpha_s$ ,  $\alpha_h$ ,  $\alpha_d$ ,  $\alpha_b$ ,  
 322  $\alpha_p$ , and  $\alpha_e$  to 0.001, 0.01, 0.1, 0.25, 0.5, 0.75, 0.9, 0.99, or 0.999. In general, the parameters  $\alpha_b$ ,  $\alpha_p$ , and  $\alpha_e$  affect dynamics  
 323 only when their respective mechanisms are turned on, since  $\alpha_b$  and  $\alpha_e$  play a role only when those mechanisms are on, and we  
 324 set  $\alpha_p = 0$  unless that mechanism is turned on.

325 We calculated the probability that an individual survives a simulation for group sizes ranging from 1 to 100, for both an  
 326 “abundant resource” regime and a “scarce resource” regime. We define the abundant resource regime as the condition where a  
 327 solitary individual is expected to have exactly 0 energy at the end of the simulation (see *Methods: Calculating the “edge of*  
 328 *starvation”*). The free parameters available to tune this “edge of starvation” are  $c_0$  and  $c_1$ . We choose to use  $c_1$ , while setting  $c_0$   
 329 to 1. If the edge of starvation (and therefore the abundant resource regime) is given by  $c_1^*$ , then we define the scarce resource  
 330 regime by setting  $c_1$  to  $sc_1^*$ , where  $s = 1.01$  or  $1.05$ , implying that when resources are scarce, it takes longer (*i.e.*, more energy)  
 331 for a group to detect each resource. For each combination of parameter values, we ran 10,000 simulations for each group  
 332 size and computed the optimal group size for both the abundant and scarce resource conditions (see *Methods: Computing*  
 333 *the optimal group size*). In our analyses, we only included a set of parameter values if at least one group size, in each of the  
 334 abundant and scarce conditions, had a survival probability greater than 5%, and if none of the group sizes, in both the abundant  
 335 and scarce conditions, had survival probabilities greater than 95%, in order to accurately estimate the optimal group size.

### 336 Limits on the strength of the social benefits

337 We typically assume that the benefits of sociality increase sublinearly with group size. For the collective territoriality, collective  
 338 niche expansion, and collective consumption mechanisms, we simply set  $\gamma_{max} = 1$ ,  $\gamma_{hmax} = 1$ , and  $\gamma_{dmax} = 1$ . For other mortality,  
 339 we need  $p_p(M = 2) \geq p_p(M = 1)/2$ , so that  $k_{pmax} = \log(1/2)/\log(\alpha_p)$ .

340 We define the criteria for the sensing/detection, energetics, and dispersal mechanisms somewhat differently because the  
 341 sublinear accrual of benefits cannot be defined for these mechanisms. Instead, for these mechanisms, we assume that groups  
 342 of size 2 ( $M = 2$ ) have, at best, a performance halfway between a solitary individual and an infinitely large group. For  
 343 the sensing/detection mechanism, we have  $p_s(M = 2) \leq (1 + \alpha_s)/2$ , which gives us  $k_{smax} = \log(1/2)/\log(1 - \alpha_s)$ . For the  
 344 energetics mechanism, we have  $c_b(M = 2) \geq c_1(1 + \alpha_b)/2$ , so that  $k_{bmax} = \log((1 - \alpha_b)/2)/\log(1 - \alpha_b) - 1$ . For the dispersal  
 345 mechanism, we have  $p_e(M = 2) \leq \alpha_e/2$ , so that  $k_{emax} = \log(1/2)/\log(\alpha_e)$ .

### 346 Calculating the “edge of starvation”

347 We define the “edge of starvation” as an environment where a solitary individual in the abundant resources condition has, on  
 348 average, exactly 0 energy stores at the end of the simulation.

349 To calculate this, we first calculate the mean energy that a solitary individual extracts from a potential resource. The  
 350 probability that a resource is of size  $C$  is  $(1 + \gamma_C)C^{\gamma_C}/C_{max}^{1+\gamma_C}$ , where we set  $C_{max} = 1$  and  $\gamma_C = -3/4$ . There are two conditions  
 351 to consider: 1) where  $\alpha_h \leq \alpha_d$ , and 2) where  $\alpha_h > \alpha_d$ . For condition (1), a solitary individual can entirely consume any resource  
 352 that it captures, so we just need to find the expected size of resources ranging in size from 0 to  $\alpha_h$ :

$$\langle C \rangle = \int_0^{\alpha_h} \frac{C(1 + \gamma_C)C^{\gamma_C}}{C_{max}^{1+\gamma_C}} dC = \left( \frac{1 + \gamma_C}{2 + \gamma_C} \right) \frac{\alpha_h^{2+\gamma_C}}{C_{max}^{1+\gamma_C}}$$

353 For condition (2), a solitary individual can entirely consume a resource it captures if its size  $C \leq \alpha_d$  but only consumes  $\alpha_d$   
 354 of the resource if  $C > \alpha_d$ ; the mean energy consumed in this case is:

$$\langle C \rangle = \int_0^{\alpha_d} \frac{C(1 + \gamma_C)C^{\gamma_C}}{C_{max}^{1+\gamma_C}} dC + \int_{\alpha_d}^{\alpha_h} \frac{\alpha_d(1 + \gamma_C)C^{\gamma_C}}{C_{max}^{1+\gamma_C}} dC = \left( \frac{\alpha_d}{C_{max}^{1+\gamma_C}} \right) \left( \alpha_h^{1+\gamma_C} - \frac{\alpha_d^{1+\gamma_C}}{2 + \gamma_C} \right)$$

355 The mean total energy gained in a simulation by a solitary individual is  $C_{total} = \mu_1 \alpha_s \langle C \rangle$ . For the solitary individual to  
 356 have 0 energy at the end of the simulation, we need  $c_0 + C_{total} - c_1 = 0$ .

### 357 **Computing the optimal group size**

358 For all of the mechanisms except the dispersal mechanism, we simply locate the group size, for each of the abundant and  
 359 scarce resource conditions, that maximizes the probability of survival. For the dispersal mechanism, the probability of survival  
 360 asymptotes to  $\alpha_e$  for large group sizes, so it is difficult to determine the optimal group size in simulations because a wide  
 361 range of group sizes have survival probabilities close to  $\alpha_e$ . We observe that, for this mechanism, as group size increases, the  
 362 probability of survival appears to either monotonically increase, or initially decrease and then increase. Therefore, the optimal  
 363 group size can only either be  $M = 1$  or  $M = \infty$  (or  $M = 100$  for our simulations). Therefore, we simply observed the survival  
 364 probability for the two extreme group sizes to determine the optimal group size.

### 365 **Analytical solution**

Here, we assume  $C_{max} > C_h$ . Let us use  $P_c(x; M)$  as the probability that an individual consumes exactly  $x$  calories when in a  
 group size  $M$ , and  $F_c(x; M)$  as the probability function of  $P_c(x; M)$ —*i.e.*, the probability that an individual consumes  $x$  calories  
 or less ( $F_c(x; M) = P_c(X \leq x; M)$ ). Altogether, we may write the survival probability of an individual,  $S(M)$ , as

$$S(M) = (1 - p_p(M))(1 - F_c(c_b - c_0; M)(1 - p_e(M))).$$

366 That is, an individual survives if it does not die from non-resource-related causes (with probability  $1 - p_p(M)$ ) and it does  
 367 not die of starvation, which we can calculate as the reciprocal of the probability of starvation—given by the probability that the  
 368 caloric intake is insufficient ( $F_c(c_b - c_0; M)$ )—times the probability of unsuccessful dispersal  $1 - p_e(M)$ . As before,  $c_b(M)$   
 369 denotes the energy that individuals burn and  $c_0 = 1$  represents the initial energy level—an individual has insufficient energy  
 370 to survive when consuming less than  $c_b - c_0$ . While  $p_p(M)$  and  $p_e(M)$  are directly set by model parameters (see *Methods:*  
 371 *Detailed description of the model framework*),  $F_c(x; M)$  is not; it is instead an emergent quantity of the model, which we now  
 372 derive. To simplify the notation, we will omit arguments  $M$ , and simply refer to  $p_p$ ,  $p_e$ ,  $c_b$ ,  $C_h$ ,  $c_d$ , and  $F_c(x)$ .

### 373 **One prey scenario ( $\mu_1 = 1$ and $\gamma_i = 0$ )**

First, we note that an individual obtains no resources at all when 1) the available prey is larger than the niche size  $C_h$  or 2) even  
 if its size is within reach, when the prey is not detected or captured. The probability of obtaining 0 resources is therefore given  
 by

$$g(M) + (1 - g(M))(1 - p_s) = 1 + p_s(g(M) - 1),$$

374 where  $g(M)$  is the probability that prey has size higher than  $C_h$ ,  $g(M) = 1 - \int_0^{C_h} P(x) dx = 1 - C_h^{\gamma_c+1} / C_{max}^{\gamma_c+1}$  and  $p_s$  is the capture  
 375 probability.

Second, the probability of capturing prey, yet consuming  $x$  or less out of it, is given by  $f_C(x) = \int_0^x P_c(x) dx$ , where  $P_c(x)$  is  
 the probability of consuming exactly  $x$  calories. Note that the prey captured is divided by the group (with size  $M$ ) before being  
 consumed. As a result, the probability of consuming  $y$  calories,  $P_c(y)$ , can be derived from the probability of capturing a prey  
 worth  $x$  calories  $P(x) = (1 + \gamma_c)x^{\gamma_c} / C_{max}^{1+\gamma_c}$ , after the change of variable  $y = x/M$ , yielding  $y^{-1} = h(x) = xM$ . Accounting for  
 the Jacobian involved in the change of variable, this results in  $P_c(x) = P(h(x))h'(x) = P(xM)M$ . The probability of consuming  
 less than  $x$  of a captured resource,  $f_C(x; M)$ , thus reads

$$f_C(x; M) = \int_0^x P(zM)M dz = (xM)^{\gamma_c+1} / C_{max}^{1+\gamma_c}.$$

We can now write down the probability of consuming less than  $x$  calories,  $F_c(x)$ . It is given by 1) the probability of failing  
 to capture any resource plus 2) the probability of capturing a resource yet consuming less than  $x$  ( $0 \leq x < \frac{C_h}{M}$ ) out of it:

$$F_c(x; M) = 1 + p_s(g(M) - 1) + p_s f_C(x) = 1 + p_s(g(M) - 1 + f_C(x)).$$

Finally, we complement the probability function above to account for consumption limitation due to the collective consumption  
 mechanism. If  $c_d M > C_h$  (**scenario 1**), collective consumption does not play any role: it would only affect the level of energy  
 intake for prey larger than the threshold imposed by the niche constraint. If  $c_d M < C_h$  (**scenario 2**) and  $x > c_d$ , however,  
 collective consumption—rather than resource competition—limits energy intake. This means that a prey can be so large that it  
 cannot be fully consumed by the group. If this is the case, then an individual always consumes  $c_d$  or less, such that  $F_c(x)$  is  
 given by

$$F_c(x) = \begin{cases} 1 + p_s(g(M) - 1 + f_C(x)) & \text{if } x < c_d \\ 1 & \text{if } x \geq c_d \end{cases}.$$

To summarize, the probability of survival is given by

$$S(M) = (1 - p_p)(1 - F_c(c_b - c_0)(1 - p_e)),$$

where under **scenario 1** ( $c_d M > C_h$ ) the probability function of resource consumed is given by

$$F_c(x; M) = 1 + p_s \left[ \left( \frac{xM}{C_{max}} \right)^{\gamma_c+1} - \left( \frac{C_h}{C_{max}} \right)^{\gamma_c+1} \right],$$

and, under **scenario 2** ( $c_d M < C_h$ ), the probability function of resource consumed is given by

$$F_c(x; M) = \begin{cases} 1 + p_s \left[ \left( \frac{xM}{C_{max}} \right)^{\gamma_c+1} - \left( \frac{C_h}{C_{max}} \right)^{\gamma_c+1} \right] & \text{if } x \leq c_d \\ 1 & \text{if } x > c_d \end{cases}.$$

**Multiple prey scenario** ( $\mu_1 > 1$  or  $\gamma_i > 0$ )

When more than one resource is available, calculating  $F_c(x)$  requires calculating the probability that consuming a combination of several resources leads to insufficient energy. Given the highly heterogeneous distribution of resource sizes assumed, such calculation involves a combinatorial problem hard to solve analytically. Nonetheless, it is possible to compute  $F_c(x)$  numerically, when multiple resources exist. We can use the inverse transform sampling method to sample random values from a distribution of caloric gains per resource. Random values of caloric gain can be sampled by 1) sampling random values from a standard uniform distribution ( $y \sim U(0, 1)$ ) and 2) calculating  $F_c^{-1}(y)$ , where  $F_c^{-1}(y)$  is the inverse of function  $F_c(x)$  (i.e., the CDF function of  $P_c(x)$ , the probability of consuming  $x$ —defined above). Considering the two scenarios already mentioned, we have, for **scenario 1** ( $c_d M > C_h$ ),

$$F_c^{-1}(y; M) = \begin{cases} 0 & \text{if } y \in [0, F_c(0)] \\ \frac{C_{max}}{M} \left( \frac{y-1+p_s C_h^{\gamma_c+1}}{p_s} \right)^{1/(\gamma_c+1)} & \text{if } y \in [F_c(0), 1] \end{cases}.$$

Note that  $F_c(x)$  is only defined in the interval  $x \in [0, \frac{C_h}{M}]$ , thereby  $F_c^{-1}(y)$  is defined for  $y \in [F_c(0), F_c(\frac{C_h}{M})]$ , where  $F_c(0) = 1 - p_s (\frac{C_h}{C_{max}})^{\gamma_c+1}$  and  $F_c(\frac{C_h}{M}) = 1$ . Following a similar reasoning, for **scenario 2** ( $c_d M < C_h$ ) we have:

$$F_c^{-1}(y; M) = \begin{cases} 0 & \text{if } y \in [0, F_c(0)] \\ \frac{C_{max}}{M} \left( \frac{y-1+p_s C_h^{\gamma_c+1}}{p_s} \right)^{1/(\gamma_c+1)} & \text{if } y \in [F_c(0), F_c(c_d)] \\ \alpha_d M^{\gamma_d} & \text{if } y \in [F_c(c_d), 1] \end{cases}.$$

Where  $F_c(c_d) = 1 + p_s \left[ \left( \frac{c_d M}{C_{max}} \right)^{\gamma_c+1} - \left( \frac{C_h}{C_{max}} \right)^{\gamma_c+1} \right]$ . Using  $F_c^{-1}(y)$ , we can now calculate the probability of getting insufficient energy by taking the average (over many trials,  $N$ ) of sampling  $\mu$  values of energy intake, using  $F_c^{-1}(y)$  and each time sampling  $y$  from a uniform standard distribution. This way, a numerical approximation of  $F_c(x; M)$ —which we denote by  $\overline{F}_c(x; M)$ —is given by

$$\overline{F}_c(x; M) = \frac{1}{N} \sum_{i=1}^N \theta \left( \sum_{j=1}^{\mu} F_c^{-1}(y \sim U(0, 1); M) - x \right),$$

where  $\theta(x) = 1$  if  $x \geq 0$  and  $\theta(x) = 0$  otherwise.  $\overline{F}_c(x; M)$  can be directly used in the probability of survival,  $S(M)$ , defined above. We used  $N = 10,000$  in Figure 2A and  $N = 1,000$  in Figure 4.

### Dragon and unicorn analyses

Based on the supernatural histories of dragons and unicorns, we posited ranges for the parameters  $\mu_1$ ,  $\alpha_s$ ,  $\alpha_h$ ,  $\alpha_d$ ,  $\alpha_b$ ,  $\alpha_p$ , and  $\alpha_e$  for the two species. We assume that dragons eat large meals relatively infrequently, so we set  $\mu_1 = 1$ . When dragons do hunt we assume they detect prey relatively easily since they can fly, and that their fierceness allows them to capture even large prey solitarily—though not the very largest potential prey in their environment. We therefore restricted both the individual

385 detection/capture parameter ( $\alpha_s$ ) and the niche or maximum size parameter ( $\alpha_h$ ) for dragons to between 0.5-0.7. Likewise, we  
386 also use a relatively high range of 0.5-0.7 for the individual consumption parameter ( $\alpha_d$ ) for dragons, as their fire-breathing  
387 abilities mean that they can cook their food, to better extract nutrients and delay rot. We fixed  $\alpha_b$  at 0.4, as dragons can take  
388 advantage to some degree of aerodynamic drafting while flying in groups,  $\alpha_p$  at 0.3, as dragons' extremely low predation risk  
389 reduces other mortality overall, and  $\alpha_e$  at 0.8, as dragons' flight makes them excellent dispersers. The last three parameters  
390 were fixed at specific values, rather than ranges, for both dragons and unicorns, so that all of the mechanisms took up the same  
391 volume of parameter space and could be directly compared with each other.

392 While one may expect unicorns' powers to help them find resources, we assume their magical horn does not aid in foraging,  
393 specifically. We set  $\mu_1 = 1$  for unicorns, as they typically will not encounter more than one patch of grass at a time. Unicorns  
394 are notoriously skittish, so we assume that they spend a large portion of their time on anti-predator vigilance, leaving less time  
395 for foraging. Therefore, we restrict  $\alpha_s$  to between 0.1-0.3. We also restrict  $\alpha_h$  and  $\alpha_d$  to 0.1-0.3, as their herbivorous diet means  
396 that even their largest meals are relatively low in calories, and they can consume only a small fraction of a grass patch they find.  
397 We fixed  $\alpha_b$  at 0.8, as unicorns derive no strong group benefit in terms of energetics,  $\alpha_p$  at 0.5, because, while they are cryptic,  
398 they are susceptible to predators, and  $\alpha_e$  at 0.2, as unicorns are known for rarely leaving the relative safety of their natal forest,  
399 thus making successful dispersal unlikely.

400 We used the analytical solution for this analysis, and uniformly sampled the region of parameter space for each species at a  
401 resolution of 0.01 for each parameter, recording whether the optimal group size decreased, increased, or did not change, when  
402 resources became scarce. For Figures 4C and F, we removed results for which the optimal group size was 1 for both conditions  
403 (because we are interested in the social behavior of these two species). Then, given a particular hypothetical experimental  
404 result (*i.e.*, decrease, increase, or no change), we calculated the proportion of results arising from each of the seven benefits of  
405 sociality.

## 406 References

- 407 1. Ward, A. & Webster, M. *Sociality: The Behaviour of Group-Living Animals* (Springer, 2016).
- 408 2. Sumpter, D. T. *Collective Animal Behavior* (Princeton University Press, 2010).
- 409 3. Clutton-Brock, T. Cooperation between non-kin in animal societies. *Nature* **462**, 51–57 (2009).
- 410 4. Krause, J. & Ruxton, G. D. *Living in Groups* (Oxford University Press, 2002).
- 411 5. Bowen, W. D. Variation in coyote social organization: the influence of prey size. *Can. J. Zool.* **59**, 639–652 (1981).
- 412 6. Pride, R. E., Felantsoa, D., Randriamboavonjy, T. M. & Randriambelona, R. Resource defense in *Lemur catta*: The  
413 Importance of group size. *Ringtailed Lemur Biol.* 208–232 (2006).
- 414 7. Yip, E. C., Powers, K. S. & Avilés, L. Cooperative capture of large prey solves scaling challenge faced by spider societies.  
415 *Proc. Natl. Acad. Sci. United States Am.* **105**, 11818–11822 (2008).
- 416 8. Lönnstedt, O. M., Ferrari, M. C. O. & Chivers, D. P. Lionfish predators use flared fin displays to initiate cooperative  
417 hunting. *Biol. Lett.* **10**, 20140281 (2014).
- 418 9. Chappell, M. A., Buttemer, W. A. & Russell, A. F. Energetics of communal roosting in chestnut-crowned babblers:  
419 implications for group dynamics and breeding phenology. *J. Exp. Biol.* **219**, 3321–3328 (2016).
- 420 10. Russo, D. *et al.* Sociality influences thermoregulation and roost switching in a forest bat using ephemeral roosts. *Ecol.*  
421 *Evol.* **7**, 5310–5321 (2017).
- 422 11. Ebersperger, L. A. A review of the evolutionary causes of rodent group-living. *Acta Theriol.* **46**, 115–144 (2001).
- 423 12. Rubenstein, D. I. On predation, competition, and the advantages of group living. In Bateson, P. (ed.) *Social Behavior*,  
424 chap. 9, 205–231 (Springer, 1978).
- 425 13. Cresswell, W. Flocking is an effective anti-predation strategy in redshanks, *Tringa totanus*. *Animal Behav.* **47**, 433–442  
426 (1994).
- 427 14. Hill, R. A. & Lee, P. C. Predation risk as an influence on group size in cercopithecoid primates: implications for social  
428 structure. *J. Zool.* **245**, 447–456 (1998).
- 429 15. Beauchamp, G. Relaxed predation risk reduces but does not eliminate sociality in birds. *Biol. Lett.* **6**, 472–474 (2010).

- 430 **16.** Randall, J. A. Environmental constraints and the evolution of sociality in semifossorial desert rodents. In Wolff, J. O. &  
431 Sherman, P. W. (eds.) *Rodent Societies: An Ecological and Evolutionary Perspective*, chap. 31, 368–379 (The University  
432 of Chicago Press, 2007).
- 433 **17.** Port, M., Kappeler, P. M. & Johnstone, R. A. Communal defense of territories and the evolution of sociality. *Am. Nat.*  
434 **178**, 787–800 (2011).
- 435 **18.** Evans, J. C., Votier, S. C. & Dall, S. R. X. Information use in colonial living. *Biol. Rev. Camb. Philos. Soc.* **91**, 658–672  
436 (2016).
- 437 **19.** Mayer, C. & Pasinelli, G. New support for an old hypothesis: density affects extra-pair paternity. *Ecol. Evol.* **3**, 694–705  
438 (2013).
- 439 **20.** Møller, A. P. & Birkhead, T. R. Cuckoldry and sociality: a comparative study of birds. *The Am. Nat.* **142**, 118–140  
440 (1993).
- 441 **21.** Covas, R. & Griesser, M. Life history and the evolution of family living in birds. *Proc. Royal Soc. B: Biol. Sci.* **274**,  
442 1349–1357 (2007).
- 443 **22.** Silk, J. B. The adaptive value of sociality in mammalian groups. *Philos. Transactions Royal Soc. B: Biol. Sci.* **362**,  
444 539–559 (2007).
- 445 **23.** Steenbeek, R. & van Schaik, C. P. Competition and group size in Thomas’s langurs (*Presbytis thomasi*): the folivore  
446 paradox revisited. *Behav. Ecol. Sociobiol.* **49**, 100–110 (2001).
- 447 **24.** Crockett, M. M. & Janson, C. H. Infanticide in red howlers: female group size, male composition, and a possible link to  
448 folivory. In Schaik, C. P. & Janson, C. H. (eds.) *Infanticide by Males and its Implications*, 75–98 (Cambridge University  
449 Press, 2000).
- 450 **25.** Olson, M. *The Logic of Collective Action: Public Goods and the Theory of Groups*, vol. 124 (Harvard University Press,  
451 2009).
- 452 **26.** Barnard, C. J. & Sibly, R. M. Producers and scroungers: A general model and its application to captive flocks of house  
453 sparrows. *Animal Behav.* **29**, 543–550 (1981).
- 454 **27.** Packer, C. & Ruttan, L. The evolution of cooperative hunting. *The Am. Nat.* **132**, 159–198 (1988).
- 455 **28.** Johnson, D. D. P., Kays, R., Blackwell, P. G. & Macdonald, D. W. Does the resource dispersion hypothesis explain group  
456 living? *Trends Ecol. Evol.* **17**, 563–570 (2002).
- 457 **29.** Powers, S. T. & Lehmann, L. When is bigger better? The effects of group size on the evolution of helping behaviours.  
458 *Biol. Rev.* **92**, 902–920 (2017).
- 459 **30.** Fronhofer, E. A., Liebig, J., Mitesser, O. & Poethke, H. J. Eusociality outcompetes egalitarian and solitary strategies  
460 when resources are limited and reproduction is costly. *Ecol. Evol.* **8**, 12953–12964 (2018).
- 461 **31.** Alexander, R. D. The evolution of social behavior. *Annu. Rev. Ecol. Syst.* **5**, 325–383 (1974).
- 462 **32.** Macdonald, D. W. The ecology of carnivore social behaviour. *Nature* **301**, 379–384 (1983).
- 463 **33.** Ritz, D. A. Costs and benefits as a function of group size: experiments on a swarming mysid, *Paramesopodopsis rufa*  
464 Fenton. In Parrish, J. K. & Hamner, W. M. (eds.) *Animal Groups in Three Dimensions: How Species Aggregate*, chap. 13,  
465 194–206 (Cambridge University Press, 1997).
- 466 **34.** Lang, S. D. J. & Farine, D. R. A multidimensional framework for studying social predation strategies. *Nat. Ecol. & Evol.*  
467 **1**, 1230–1239 (2017).
- 468 **35.** Langwig, K. E. *et al.* Sociality, density-dependence and microclimates determine the persistence of populations suffering  
469 from a novel fungal disease, white-nose syndrome. *Ecol. Lett.* **15**, 1050–1057 (2012).
- 470 **36.** Nunn, C. L., Thrall, P. H., Stewart, K. & Harcourt, A. H. Emerging infectious diseases and animal social systems. *Evol.*  
471 *Ecol.* **22**, 519–543 (2008).
- 472 **37.** Irwin, M. T. Living in forest fragments reduces group cohesion in diademed sifakas (*Propithecus diadema*) in eastern  
473 Madagascar by reducing food patch size. *Am. J. Primatol.* **69**, 434–447 (2007).



- 474 **38.** Wilcove, D. S. & Wikelski, M. Going, going, gone: Is animal migration disappearing? *PLoS Biol.* **6**, 1361–1364 (2008).
- 475 **39.** Wong, B. B. M. & Candolin, U. Behavioral responses to changing environments. *Behav. Ecol.* **26**, 665–673 (2015).
- 476 **40.** Gavrillets, S. Collective action problem in heterogeneous groups. *Philos. Transactions Royal Soc. B: Biol. Sci.* **370**,  
477 20150016 (2015).
- 478 **41.** Creel, S. Cooperative hunting and group size: assumptions and currencies. *Animal Behav.* **54**, 1319–1324 (1997).
- 479 **42.** Packer, C., Scheel, D. & Pusey, A. E. Why lions form groups: food is not enough. *The Am. Nat.* **136**, 1–19 (1990).
- 480 **43.** Bell, G. Fluctuating selection: the perpetual renewal of adaptation in variable environments. *Philos. Transactions Royal*  
481 *Soc. B: Biol. Sci.* **365**, 87–97 (2010).
- 482 **44.** Smith, J. E., Kolowski, J. M., Graham, K. E., Dawes, S. E. & Holekamp, K. E. Social and ecological determinants of  
483 fission-fusion dynamics in the spotted hyaena. *Animal Behav.* **76**, 619–636 (2008).
- 484 **45.** Gimeno, C. J., Ljungdahl, P. O., Styles, C. A. & Fink, G. R. Unipolar cell divisions in the yeast *S. cerevisiae* lead to  
485 filamentous growth: regulation by starvation and RAS. *Cell* **68**, 1077–1090 (1992).
- 486 **46.** Rubenstein, D. I. & Wrangham, R. W. *Ecological Aspects of Social Evolution: Birds and Mammals* (Princeton University  
487 Press, 1986).
- 488 **47.** Wrangham, R. W. An ecological model of female-bonded primate groups. *Behaviour* **75**, 262–300 (1980).
- 489 **48.** Helms Cahan, S., Blumstein, D. T., Sundström, L., Liebig, J. & Griffin, A. Social trajectories and the evolution of social  
490 behavior. *Oikos* **96**, 206–216 (2002).
- 491 **49.** Herrera, E. A. & Macdonald, D. W. Resource utilization and territoriality in group-living capybaras (*Hydrochoerus*  
492 *hydrochaeris*). *J. Animal Ecol.* **58**, 667–679 (1989).
- 493 **50.** Langen, T. A. & Vehrencamp, S. L. Ecological factors affecting group and territory size in white-throated magpie-jays.  
494 *The Auk* **115**, 327–339 (1998).
- 495 **51.** Lamprecht, J. The function of social hunting in larger terrestrial carnivores. *Mammal Rev.* **11**, 169–179 (1981).
- 496 **52.** Palmer, T. M. Wars of attrition: colony size determines competitive outcomes in a guild of African acacia ants. *Animal*  
497 *Behav.* **68**, 993–1004 (2004).
- 498 **53.** Lowen, C. & Dunbar, R. I. M. Territory size and defendability in primates. *Behav. Ecol. Sociobiol.* **35**, 347–354 (1994).
- 499 **54.** Solari, C. A., Michod, R. E. & Goldstein, R. E. *Volvox barberi*, the fastest swimmer of the Volvocales (Chlorophyceae). *J.*  
500 *Phycol.* **44**, 1395–1398 (2008).
- 501 **55.** Bowyer, R. T., McCullough, D. R. & Belovsky, G. E. Causes and consequences of sociality in mule deer. *Alces* **37**,  
502 371–402 (2001).
- 503 **56.** Fernández, G. J., Capurro, A. F. & Reboreda, J. C. Effect of group size on individual and collective vigilance in greater  
504 rheas. *Ethology* **109**, 413–425 (2003).
- 505 **57.** Ebensperger, L. A., Hurtado, M. J. & Ramos-Jiliberto, R. Vigilance and collective detection of predators in degus  
506 (*Octodon degus*). *Ethology* **112**, 879–887 (2006).
- 507 **58.** Fernández-Juricic, E., Beauchamp, G. & Bastain, B. Group-size and distance-to-neighbour effects on feeding and  
508 vigilance in brown-headed cowbirds. *Animal Behav.* **73**, 771–778 (2007).
- 509 **59.** Brandl, S. J. & Bellwood, D. R. Coordinated vigilance provides evidence for direct reciprocity in coral reef fishes. *Sci.*  
510 *Reports* **5**, 14556 (2015).
- 511 **60.** Hardie, S. M. & Buchanan-Smith, H. M. Vigilance in single- and mixed-species groups of tamarins (*Saguinus labiatus*  
512 and *Saguinus fuscicollis*). *Int. J. Primatol.* **18**, 217–234 (1997).
- 513 **61.** Pitcher, T. J., Magurran, A. E. & Winfield, I. J. Fish in larger shoals find food faster. *Behav. Ecol. Sociobiol.* **10**, 149–151  
514 (1982).
- 515 **62.** Despland, E. & Le Huu, A. Pros and cons of group living in the forest tent caterpillar: separating the roles of silk and of  
516 grouping. *Entomol. Exp. et Appl.* **122**, 181–189 (2007).

- 517 **63.** Carrascal, L. M. & Tellería, J. L. Flock size of birds wintering in a cultivated area. Influence of vegetation structure and  
518 type of diet. *Ekol. Polska* **38**, 201–210 (1990).
- 519 **64.** Horn, H. S. The adaptive significance of colonial nesting in the Brewer's blackbird (*Euphagus cyanocephalus*). *Ecology*  
520 **49**, 682–694 (1968).
- 521 **65.** Snijders, L., Kurvers, R. H. J. M., Krause, S., Ramnarine, I. W. & Krause, J. Individual- and population-level drivers of  
522 consistent foraging success across environments. *Nat. Ecol. Evol.* **2**, 1610–1618 (2018).
- 523 **66.** Hector, D. P. Cooperative hunting and its relationship to foraging success and prey size in an avian predator. *Ethology* **73**,  
524 247–257 (1986).
- 525 **67.** Stander, P. E. & Albon, S. D. Hunting success of lions in a semi-arid environment. *Symp. Zool. Soc. Lond.* **65**, 127–143  
526 (1993).
- 527 **68.** Bshary, R., Hohner, A., Ait-el Djoudi, K. & Fricke, H. Interspecific communicative and coordinated hunting between  
528 groupers and giant moray eels in the red sea. *PLoS Biol.* **4**, 2393–2398 (2006).
- 529 **69.** Boesch, C. & Boesch, H. Hunting behavior of wild chimpanzees in the Taï National Park. *Am. J. Phys. Anthropol.* **78**,  
530 547–573 (1989).
- 531 **70.** Fraleigh, P. C. & Burnham, J. C. *Myxococcal* predation on cyanobacterial populations: Nutrient effects. *Limnol. Oceanogr.*  
532 **33**, 476–483 (1988).
- 533 **71.** Benoit-Bird, K. J. & Au, W. W. L. Cooperative prey herding by the pelagic dolphin, *Stenella longirostris*. *The J. Acoust.*  
534 *Soc. Am.* **125**, 125–137 (2009).
- 535 **72.** Powers, K. S. & Avilés, L. The role of prey size and abundance in the geographical distribution of spider sociality. *J.*  
536 *Animal Ecol.* **76**, 995–1003 (2007).
- 537 **73.** Majer, M., Holm, C., Lubin, Y. & Bilde, T. Cooperative foraging expands dietary niche but does not offset intra-group  
538 competition for resources in social spiders. *Sci. Reports* **8**, 11828 (2018).
- 539 **74.** Creel, S. & Creel, N. M. Communal hunting and pack size in African wild dogs, *Lycaon pictus*. *Animal Behav.* **50**,  
540 1325–1339 (1995).
- 541 **75.** Cerdá, X. & Dejean, A. Predation by ants on arthropods and other animals. In Polidori, C. (ed.) *Predation in Hymenoptera:*  
542 *An Evolutionary Perspective*, 39–78 (TransWorld Research Network, 2011).
- 543 **76.** Bednarz, J. C. Cooperative hunting in Harris' hawks (*Parabuteo unicinctus*). *Science* **239**, 1525–1527 (1988).
- 544 **77.** Williams, P. *et al.* Quorum sensing and the population-dependent control of virulence. *Philos. Transactions Royal Soc. B:*  
545 *Biol. Sci.* **355**, 667–680 (2000).
- 546 **78.** Crespi, B. J. The evolution of social behavior in microorganisms. *Trends Ecol. Evol.* **16**, 178–183 (2001).
- 547 **79.** Ebert, D. A. Observations on the predatory behaviour of the sevengill shark *Notorynchus Cepedianus*. *South Afr. J. Mar.*  
548 *Sci.* **11**, 455–465 (1991).
- 549 **80.** Guinet, C., Barrett-Lennard, L. G. & Loyer, B. Co-ordinated attack behavior and prey sharing by killer whales at Crozet  
550 Archipelago: Strategies for feeding on negatively-buoyant prey. *Mar. Mammal Sci.* **16**, 829–834 (2000).
- 551 **81.** Baird, R. W. & Dill, L. M. Ecological and social determinants of group size in *transient* killer whales. *Behav. Ecol.* **7**,  
552 408–416 (1996).
- 553 **82.** Blundell, G. M., Ben-David, M. & Bowyer, R. T. Sociality in river otters: cooperative foraging or reproductive strategies?  
554 *Behav. Ecol.* **13**, 134–141 (2002).
- 555 **83.** Lehmann, K. D. *et al.* Lions, hyenas and mobs (oh my!). *Curr. Zool.* **63**, 313–322 (2017).
- 556 **84.** Rigali, S. *et al.* Feast or famine: the global regulator DasR links nutrient stress to antibiotic production by *Streptomyces*.  
557 *EMBO Reports* **9**, 670–675 (2008).
- 558 **85.** Fisher, R. M. & Regenberg, B. Multicellular group formation in *Saccharomyces cerevisiae*. *Proc. Royal Soc. B: Biol. Sci.*  
559 **286**, 20191098 (2019).

- 560 **86.** McCreery, H. F. & Breed, M. D. Cooperative transport in ants: a review of proximate mechanisms. *Insectes Sociaux* **61**,  
561 99–110 (2014).
- 562 **87.** Czaczkes, T. J. & Ratnieks, F. L. W. Cooperative transport in ants (Hymenoptera: Formicidae) and elsewhere. *Myrmeco-*  
563 *logical News* **18**, 1–11 (2013).
- 564 **88.** Rosenberg, E., Keller, K. H. & Dworkin, M. Cell density dependent growth of *Myxococcus xanthus* on casein. *J. Bacteriol.*  
565 **129**, 770–777 (1977).
- 566 **89.** Koschwanez, J. H., Foster, K. R. & Murray, A. W. Sucrose utilization in budding yeast as a model for the origin of  
567 undifferentiated multicellularity. *PLoS Biol.* **9**, e1001122 (2011).
- 568 **90.** Jurasz, C. M. & Jurasz, V. P. Feeding modes of the humpback whale, *Megaptera novaeangliae*, in southeast Alaska. *The*  
569 *Sci. Reports Whales Res. Inst.* **31**, 69–83 (1979).
- 570 **91.** Greene, E. Individuals in an osprey colony discriminate between high and low quality information. *Nature* **329**, 239–241  
571 (1987).
- 572 **92.** Tsubaki, Y. & Shiotsu, Y. Group feeding as a strategy for exploiting food resources in the burnet moth *Pryeria sinica*.  
573 *Oecologia* **55**, 12–20 (1982).
- 574 **93.** Götmark, F., Winkler, D. W. & Andersson, M. Flock-feeding on fish schools increases individual success in gulls. *Nature*  
575 **319**, 589–591 (1986).
- 576 **94.** Foster, S. A. Group foraging by a coral reef fish: a mechanism for gaining access to defended resources. *Animal Behav.*  
577 **33**, 782–792 (1985).
- 578 **95.** Berleman, J. E., Scott, J., Chumley, T. & Kirby, J. R. Predataxis behavior in *Myxococcus xanthus*. *Proc. Natl. Acad. Sci.*  
579 *United States Am.* **105**, 17127–17132 (2008).
- 580 **96.** Bigg, M. A., Ellis, G. M., Ford, J. K. B. & Balcomb, K. C. *Killer whales: A Study of their Identification, Genealogy, and*  
581 *Natural History in British Columbia and Washington State* (Phantom, 1987).
- 582 **97.** Marras, S. *et al.* Fish swimming in schools save energy regardless of their spatial position. *Behav. Ecol. Sociobiol.* **69**,  
583 219–226 (2015).
- 584 **98.** Fish, F. E. Kinematics of ducklings swimming in formation: consequences of position. *J. Exp. Zool.* **273**, 1–11 (1995).
- 585 **99.** Weimerskirch, H., Martin, J., Clerquin, Y., Alexandre, P. & Jiraskova, S. Energy saving in flight formation. *Nature* **413**,  
586 697–698 (2001).
- 587 **100.** Ritz, D. A. Is social aggregation in aquatic crustaceans a strategy to conserve energy? *Can. J. Fish. Aquatic Sci.* **57**,  
588 59–67 (2000).
- 589 **101.** Ancel, A., Gilbert, C., Poulin, N., Beaulieu, M. & Thierry, B. New insights into the huddling dynamics of emperor  
590 penguins. *Animal Behav.* **110**, 91–98 (2015).
- 591 **102.** Kronenberg, F. & Heller, H. C. Colonial thermoregulation in honey bees (*Apis mellifera*). *J. Comp. Physiol. B* **148**, 65–76  
592 (1982).
- 593 **103.** Willis, C. K. R. & Brigham, R. M. Social thermoregulation exerts more influence than microclimate on forest roost  
594 preferences by a cavity-dwelling bat. *Behav. Ecol. Sociobiol.* **62**, 97–108 (2007).
- 595 **104.** Taraborelli, P. & Moreno, P. Comparing composition of social groups, mating system and social behaviour in two  
596 populations of *Micvocavia australis*. *Mammalian Biol.* **74**, 15–24 (2009).
- 597 **105.** Simpson, S. J., Sword, G. A., Lorch, P. D. & Couzin, I. D. Cannibal crickets on a forced march for protein and salt. *Proc.*  
598 *Natl. Acad. Sci. United States Am.* **103**, 4152–4156 (2006).
- 599 **106.** Romanczuk, P., Couzin, I. D. & Schimansky-Geier, L. Collective motion due to individual escape and pursuit response.  
600 *Phys. Rev. Lett.* **102**, 010602 (2009). 0809.0413.
- 601 **107.** Berdahl, A. M. *et al.* Collective animal navigation and migratory culture: from theoretical models to empirical evidence.  
602 *Philos. Transactions Royal Soc. B: Biol. Sci.* **373**, 20170009 (2018).

- 603 **108.** Sutherland, K. R. & Weihs, D. Hydrodynamic advantages of swimming by salp chains. *J. Royal Soc. Interface* **14**,  
604 20170298 (2017).
- 605 **109.** Gadagkar, R. & Bonner, J. Social insects and social amoebae. *J. Biosci.* **19**, 219–245 (1994).
- 606 **110.** Shimkets, L. J. Intercellular signalling during fruiting-body development of *Myxococcus xanthus*. *Annu. Rev. Microbiol.*  
607 **53**, 525–549 (1999).
- 608 **111.** Clotuche, G. *et al.* The formation of collective silk balls in the spider mite *Tetranychus urticae* Koch. *PLoS ONE* **6**,  
609 e18854 (2011).
- 610 **112.** Flack, A., Nagy, M., Fiedler, W., Couzin, I. D. & Wikelski, M. From local collective behavior to global migratory patterns  
611 in white storks. *Science* **360**, 911–914 (2018).
- 612 **113.** Portugal, S. J. *et al.* Upwash exploitation and downwash avoidance by flap phasing in ibis formation flight. *Nature* **505**,  
613 399–402 (2014).
- 614 **114.** Johnson, R. A. Colony founding by pleometrosis in the semiclaustral seed-harvester ant *Pogonomyrmex californicus*  
615 (Hymenoptera: Formicidae). *Animal Behav.* **68**, 1189–1200 (2004).
- 616 **115.** Mintzer, A. C. Primary polygyny in the ant *Atta texana*: number and weight of females and colony foundation success in  
617 the laboratory. *Insectes Sociaux* **34**, 108–117 (1987).
- 618 **116.** Pull, C. D., Hughes, W. O. H. & Brown, M. J. F. Tolerating an infection: an indirect benefit of co-founding queen  
619 associations in the ant *Lasius niger*. *Naturwissenschaften* **100**, 1125–1136 (2013).
- 620 **117.** Matsuura, K. & Nishida, T. Comparison of colony foundation success between sexual pairs and female asexual units in  
621 the termite *Reticulitermes speratus* (Isoptera: Rhinotermitidae). *Popul. Ecol.* **43**, 119–124 (2001).
- 622 **118.** Le Goff, G. J. *et al.* Group effect on fertility, survival and silk production in the web spinner *Tetranychus urticae* (acari:  
623 Tetranychidae) during colony foundation. *Behaviour* **147**, 1169–1184 (2010).
- 624 **119.** Wiley, R. H. Lekking in birds and mammals: behavioral and evolutionary issues. In *Advances in the Study of Behavior*,  
625 vol. 20, 201–291 (Elsevier, 1991).
- 626 **120.** Hirsch, B. T. & Maldonado, J. E. Familiarity breeds progeny: Sociality increases reproductive success in adult male  
627 ring-tailed coatis (*Nasua nasua*). *Mol. Ecol.* **20**, 409–419 (2011).
- 628 **121.** Bergmüller, R., Johnstone, R. A., Russell, A. F. & Bshary, R. Integrating cooperative breeding into theoretical concepts  
629 of cooperation. *Behav. Process.* **76**, 61–72 (2007).
- 630 **122.** Clutton-Brock, T. Breeding together: kin selection and mutualism in cooperative vertebrates. *Science* **296**, 69–72 (2002).
- 631 **123.** Agnarsson, I., Avilés, L., Coddington, J. A. & Maddison, W. P. Sociality In theridiid spiders: repeated origins of an  
632 evolutionary dead end. *Evolution* **60**, 2342–2351 (2006).
- 633 **124.** Hutchins, M. & Barash, D. P. Grooming in primates: implications for its utilitarian function. *Primates* **17**, 145–150  
634 (1976).
- 635 **125.** MacIntosh, A. J. J. *et al.* Monkeys in the middle: parasite transmission through the social network of a wild primate.  
636 *PLoS ONE* **7**, 15–21 (2012).
- 637 **126.** Duboscq, J., Romano, V., Sueur, C. & Macintosh, A. J. J. Network centrality and seasonality interact to predict lice load  
638 in a social primate. *Sci. Reports* **6**, 22095 (2016).
- 639 **127.** Hughes, W. O. H., Eilenberg, J. & Boomsma, J. J. Trade-offs in group living: transmission and disease resistance in  
640 leaf-cutting ants. *Proc. Royal Soc. B: Biol. Sci.* **269**, 1811–1819 (2002).
- 641 **128.** Altizer, S. *et al.* Social organization and parasite risk in mammals: integrating theory and empirical studies. *Annu. Rev.*  
642 *Ecol. Evol. Syst.* **34**, 517–547 (2003).
- 643 **129.** White, E. P., Ernest, S. K., Kerkhoff, A. J. & Enquist, B. J. Relationships between body size and abundance in ecology.  
644 *Trends Ecol. Evol.* **22**, 323–330 (2007).
- 645 **130.** Jennings, S. & Mackinson, S. Abundance-body mass relationships in size-structured food webs. *Ecol. Lett.* **6**, 971–974  
646 (2003).

- 647 **131.** Rossberg, A. G., Ishii, R., Amemiya, T. & Itoh, K. The top-down mechanism for body-mass-abundance scaling. *Ecology*  
648 **89**, 567–580 (2008).
- 649 **132.** Caraco, T. & Wolf, L. L. Ecological determinants of group sizes in foraging lions. *The Am. Nat.* **109**, 343–352 (1975).
- 650 **133.** Chapman, C. A., Chapman, L. J. & Wrangham, R. W. Ecological constraints on group size: an analysis of spider monkey  
651 and chimpanzee subgroups. *Behav. Ecol. Sociobiol.* **36**, 59–70 (1995).
- 652 **134.** Campbell, G. S., Bilgre, B. A. & Defran, R. H. Bottlenose dolphins (*Tursiops truncatus*) in Turneffe Atoll, Belize:  
653 occurrence, site fidelity, group size, and abundance. *Aquatic Mamm.* **28**, 170–180 (2002).
- 654 **135.** Bearzi, G., Notarbartolo-di Sciara, G. & Politi, E. Social ecology of bottlenose dolphins in the Kvarnerić (Northern  
655 Adriatic Sea). *Mar. Mammal Sci.* **13**, 650–668 (1997).
- 656 **136.** Defran, R. H., Weller, D. W., Kelly, D. L. & Espinosa, M. A. Range characteristics of Pacific coast bottlenose dolphins  
657 (*Tursiops truncatus*) in the southern California blight. *Mar. Mammal Sci.* **15**, 381–393 (1999).
- 658 **137.** smith, j., Queller, D. C. & Strassmann, J. E. Fruiting bodies of the social amoeba *Dictyostelium discoideum* increase  
659 spore transport by *Drosophila*. *BMC Evol. Biol.* **14**, 105 (2014).
- 660 **138.** Dewanti, R. & Wong, A. C. L. Influence of culture conditions on biofilm formation by *Escherichia coli* O157:H7. *Int. J.*  
661 *Food Microbiol.* **26**, 147–164 (1995).
- 662 **139.** Zhang, W. *et al.* Nutrient depletion in *Bacillus subtilis* biofilms triggers matrix production. *New J. Phys.* **16**, 015028  
663 (2014).
- 664 **140.** Cody, M. Finch flocks in the Mohave Desert. *Theor. Popul. Biol.* **2**, 142–158 (1971).
- 665 **141.** South, J. & Pruett-Jones, S. Patterns of flock size, diet, and vigilance of naturalized Monk Parakeets in Hyde Park,  
666 Chicago. *The Condor* **102**, 848–854 (2000).
- 667 **142.** O’Toole, G., Kaplan, H. B. & Kolter, R. Biofilm formation as microbial development. *Annu. Rev. Microbiol.* **54**, 49–79  
668 (2000).
- 669 **143.** Rubenstein, D. R. & Abbot, P. *Comparative Social Evolution* (Cambridge University Press, Cambridge, UK, 2017).
- 670 **144.** Pearce, D. J., Hoogerbrugge, L. A., Hook, K. A., Fisher, H. S. & Giomi, L. Cellular geometry controls the efficiency of  
671 motile sperm aggregates. *J. Royal Soc. Interface* **15**, 20180702 (2018). 1805.12116.
- 672 **145.** Fisher, H. S., Giomi, L., Hoekstra, H. E. & Mahadevan, L. The dynamics of sperm cooperation in a competitive  
673 environment. *Proc. Royal Soc. B: Biol. Sci.* **281**, 20140296 (2014).
- 674 **146.** Maeda, N. & Shiga, T. Opposite effect of albumin on the erythrocyte aggregation induced by immunoglobulin G and  
675 fibrinogen. *Biochimica et Biophys. Acta - Biomembr.* **855**, 127–135 (1986).
- 676 **147.** Jackson, S. P. The growing complexity of platelet aggregation. *Blood* **109**, 5087–5095 (2007).
- 677 **148.** Rampling, M. W., Meiselman, H. J., Neu, B. & Baskurt, O. K. Influence of cell-specific factors on red blood cell  
678 aggregation. *Biorheology* **41**, 91–112 (2004).
- 679 **149.** Berthold, T. *et al.* HNA antibody-mediated neutrophil aggregation is dependent on serine protease activity. *Vox Sang.*  
680 **109**, 366–374 (2015).
- 681 **150.** Schauer, C. *et al.* Aggregated neutrophil extracellular traps limit inflammation by degrading cytokines and chemokines.  
682 *Nat. Medicine* **20**, 511–517 (2014).
- 683 **151.** Zarbock, A., Polanowska-Grabowska, R. K. & Ley, K. Platelet-neutrophil-interactions: linking hemostasis and inflamma-  
684 tion. *Blood Rev.* **21**, 99–111 (2007).
- 685 **152.** Ward, A. J. W., Herbert-Read, J. E., Sumpter, D. J. T. & Krause, J. Fast and accurate decisions through collective vigilance  
686 in fish shoals. *Proc. Natl. Acad. Sci. United States Am.* **108**, 2312–2315 (2011).
